# Supplementary material for: Key drug-targeting genes in pancreatic ductal adenocarcinoma
Source: PubMed Central journal article supplement (PMC8045979; doi:10.18632/genesandcancer.210), 2021-03-11

## SUPPLEMENTARY MATERIALS

**Table S1. Docking of bleomycin sulfate to fibronectin 1 (FN1) and Serpin B5**

| Protein            | Docking score | XP score | Glide energy | Hydrogen bond                                                       | Hydrophobic interactions                                               |
|--------------------|---------------|----------|--------------|---------------------------------------------------------------------|------------------------------------------------------------------------|
| FN1 (fragment)     | -7.521        | -8.506   | -106.4       | Ile1333, Asp1334, Glu1364, Gln1412, Gln1413, Ser1414                | Phe1335, Ile1338, Glu1392, Val1394, Leu1408, Ile1410, Gly1411, Thr1415 |
| Serpin B5 (Site 1) | -8.111        | -9.851   | -141.7       | Lys47, Asp49, Thr50, Thr301, Asp303, Ser305, Ser308, Thr310, Gly312 | Gly48, Ser101, Glu103, His295, Phe304, Glu309, Lys311, Val313          |
| Serpin B5 (Site 2) | -6.263        | -7.248   | -93.4        | Lys181, Glu201, Lys270, Ser272                                      | Glu177, Ser178, Glu179, Thr180, Asn199, Lys268, Lys275, Glu328, Glu347 |

**Figure S1.** The Ligplots showing the potential binding interactions of bleomycin sulfate at the interaction site between FN1 and aggrecan core protein (A), the NAG-binding site of Serpin B5 (B), and the protease binding site of Serpin B5 (C), respectively.

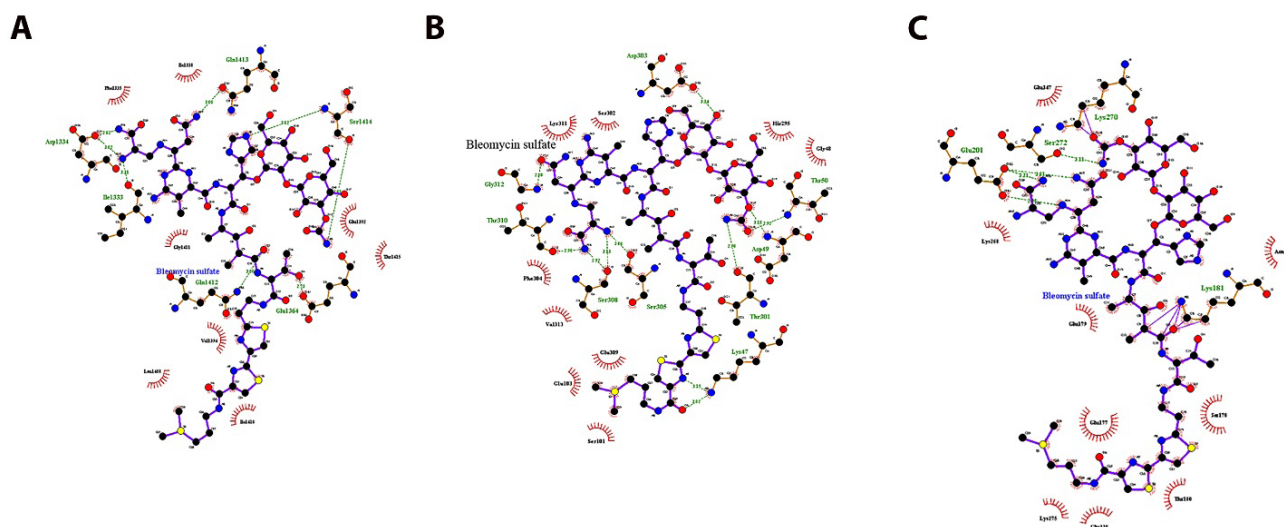

Supplement: ganc-12-12-s001.pdf [file ganc-12-12-s001.pdf]
